# Supplementary material
Source: ML conference proceedings conference paper supplement (https://proceedings.mlr.press/v80/lee18a.html)
Supplement: Supplementary file [file lee18a-supp.pdf]

# Appendices

## A Further Experimental Details

We used the same hyperparameters as [1] and terminated training after the same number of examples specified in [1]. We used a temperature  $c$  of 1, which was recommended in [2]. We initialized  $\mathbf{T}$  to be an identity matrix and all  $\zeta$  to zero.

Compared to MAML [1], training a convolutional MT-net takes roughly 0.4 times longer (omniglot 40k steps took 7h 19m for MT-net and 5h 14m for MAML). This gap is fairly small because  $1 \times 1$  convolutions require little compute compared to regular convolutions. This gap is larger (roughly 1.1 times) for fully connected MT-nets. We additionally observed that MT-nets take less training steps to converge compared to MAML.

We provide our official implementation of MT-nets at <https://github.com/yooholee/MT-net>.

## References

- [1] C. Finn, P. Abbeel., and S. Levine. Model-agnostic meta-learning for fast adaptation of deep networks. In *Proceedings of the International Conference on Machine Learning (ICML)*, Sydney, Australia, 2017.
- [2] E. Jang, S. Gu, and B. Poole. Categorical Reparameterization with Gumbel-Softmax. *Proceedings of the International Conference on Learning Representations (ICLR)*, 2017.

## B Proofs for Section 4

### B.1 MT-nets Learn a Subspace

**Proposition 1.** Fix  $\mathbf{x}$  and  $\mathbf{A}$ . Let  $\mathbf{U}$  be a  $d$ -dimensional subspace of  $\mathbb{R}^n$  ( $d \leq n$ ). There exist configurations of  $\mathbf{T}$ ,  $\mathbf{W}$ , and  $\zeta$  such that the span of  $\mathbf{y}^{\text{new}} - \mathbf{y}$  is  $\mathbf{U}$  while satisfying  $\mathbf{A} = \mathbf{T}\mathbf{W}$ .

*Proof.* We show by construction that Proposition 1 is true.

Suppose that  $\{\mathbf{v}_1, \mathbf{v}_2, \dots, \mathbf{v}_n\}$  is a basis of  $\mathbb{R}^n$  such that  $\{\mathbf{v}_1, \mathbf{v}_2, \dots, \mathbf{v}_d\}$  is a basis of  $\mathbf{U}$ . Let  $\mathbf{T}$  be the  $n \times n$  matrix  $[\mathbf{v}_1, \mathbf{v}_2, \dots, \mathbf{v}_n]$ .  $\mathbf{T}$  is invertible since it consists of linearly independent columns. Let  $\mathbf{W} = \mathbf{T}^{-1}\mathbf{A}$  and let  $\zeta_1, \zeta_2, \dots, \zeta_d \rightarrow \infty$  and  $\zeta_{d+1}, \dots, \zeta_n \rightarrow -\infty$ . The resulting mask  $\mathbf{M}$  that  $\zeta$  generates is a matrix with only ones in the first  $d$  rows and zeroes elsewhere.

$$\begin{aligned} \mathbf{y}^{\text{new}} - \mathbf{y} &= \mathbf{T}(\mathbf{W}^{\text{new}} - \mathbf{W})\mathbf{x} \\ &= \mathbf{T}(\mathbf{M} \odot \nabla_{\mathbf{W}} \mathcal{L}_{\mathcal{T}})\mathbf{x} \end{aligned} \tag{1}$$

Since all but the first  $d$  rows of  $\mathbf{M}$  are  $\mathbf{0}$ ,  $(\mathbf{M} \odot \nabla_{\mathbf{W}} \mathcal{L}_{\mathcal{T}})\mathbf{x}$  is an  $n$ -dimensional vector in which nonzero elements can only appear in the first  $d$  dimensions. Therefore, the vector  $\mathbf{T}(\mathbf{M} \odot \nabla_{\mathbf{W}} \mathcal{L}_{\mathcal{T}})\mathbf{x}$  is a linear combination of  $\{\mathbf{v}_1, \mathbf{v}_2, \dots, \mathbf{v}_d\}$ . Thus the span of  $\mathbf{y}^{\text{new}} - \mathbf{y}$  is  $\mathbf{U}$ .  $\square$

## B.2 MT-nets Learn a Metric in their Subspace

**Proposition 2.** Fix  $\mathbf{x}$ ,  $\mathbf{A}$ , and a loss function  $\mathcal{L}_{\mathcal{T}}$ . Let  $\mathbf{U}$  be a  $d$ -dimensional subspace of  $\mathbb{R}^n$ , and  $g(\cdot, \cdot)$  a metric tensor on  $\mathbf{U}$ . There exist configurations of  $\mathbf{T}$ ,  $\mathbf{W}$ , and  $\zeta$  such that the vector  $\mathbf{y}^{\text{new}} - \mathbf{y}$  is in the steepest direction of descent on  $\mathcal{L}_{\mathcal{T}}$  with respect to the metric  $du$ .

*Proof.* We show Proposition 2 is true by construction as well.

We begin by constructing a representation for the arbitrary metric tensor  $g(\cdot, \cdot)$ . Let  $\{\mathbf{v}_1, \mathbf{v}_2, \dots, \mathbf{v}_n\}$  be a basis of  $\mathbb{R}^n$  such that  $\{\mathbf{v}_1, \mathbf{v}_2, \dots, \mathbf{v}_d\}$  is a basis of  $\mathbf{U}$ . Vectors  $\mathbf{u}_1, \mathbf{u}_2 \in \mathbf{U}$  can be expressed as  $\mathbf{u}_1 = \sum_{i=1}^d c_{1i} \mathbf{v}_i$  and  $\mathbf{u}_2 = \sum_{i=1}^d c_{2i} \mathbf{v}_i$ . We can express any metric tensor  $g(\cdot, \cdot)$  using such coefficients  $c$ :

$$g(\mathbf{u}_1, \mathbf{u}_2) = \underbrace{\begin{bmatrix} c_{11} & \dots & c_{1d} \end{bmatrix}}_{\mathbf{c}_1^\top} \underbrace{\begin{bmatrix} g_{11} & \dots & g_{1d} \\ \vdots & \ddots & \vdots \\ g_{d1} & \dots & g_{dd} \end{bmatrix}}_{\mathbf{G}} \underbrace{\begin{bmatrix} c_{21} \\ \vdots \\ c_{2d} \end{bmatrix}}_{\mathbf{c}_2}, \quad (2)$$

where  $\mathbf{G}$  is a positive definite matrix. Because of this, there exists an invertible  $d \times d$  matrix  $\mathbf{H}$  such that  $\mathbf{G} = \mathbf{H}^\top \mathbf{H}$ . Note that  $g(\mathbf{u}_1, \mathbf{u}_2) = (\mathbf{H}\mathbf{c}_1)^\top (\mathbf{H}\mathbf{c}_2)$ : the metric  $g(\cdot, \cdot)$  is equal to the inner product after multiplying  $\mathbf{H}$  to given vectors  $\mathbf{c}$ .

Using  $\mathbf{H}$ , we can alternatively parameterize vectors in  $\mathbf{U}$  as

$$\mathbf{u}_1 = \underbrace{\begin{bmatrix} \mathbf{v}_1 & \dots & \mathbf{v}_d \end{bmatrix}}_{\mathbf{V}} \mathbf{c}_1 \quad (3)$$

$$= \mathbf{V}\mathbf{H}^{-1}(\mathbf{H}\mathbf{c}_1). \quad (4)$$

Here, we are using  $\mathbf{H}\mathbf{c}_1$  as a  $d$ -dimensional parameterization and the columns of the  $n \times d$  matrix  $\mathbf{V}\mathbf{H}^{-1}$  as an alternative basis of  $\mathbf{U}$ .

Let  $\mathbf{v}_1^{\mathbf{H}}, \dots, \mathbf{v}_d^{\mathbf{H}}$  be the columns of  $\mathbf{V}\mathbf{H}^{-1}$ , and set  $\mathbf{T} = [\mathbf{v}_1^{\mathbf{H}}, \dots, \mathbf{v}_d^{\mathbf{H}}, \mathbf{v}_{d+1}, \dots, \mathbf{v}_n]$ . Since  $\mathbf{H}$  is invertible,  $\{\mathbf{v}_1^{\mathbf{H}}, \dots, \mathbf{v}_d^{\mathbf{H}}\}$  is a basis of  $\mathbf{U}$  and thus  $\mathbf{T}$  is an invertible matrix. As in Proposition 1, set  $\mathbf{W} = \mathbf{T}^{-1}\mathbf{A}$ ,  $\zeta_1, \zeta_2, \dots, \zeta_d \rightarrow \infty$ , and  $\zeta_{d+1}, \dots, \zeta_n \rightarrow -\infty$ . Note that this configuration of  $\zeta$  generates a mask  $\mathbf{M}$  that projects gradients onto the first  $d$  rows, which will later be multiplied by the vectors  $\{\mathbf{v}_1^{\mathbf{H}}, \dots, \mathbf{v}_d^{\mathbf{H}}\}$ .

We can express  $\mathbf{y}$  as  $\mathbf{y} = \mathbf{V}\mathbf{c}_y = \mathbf{V}\mathbf{H}^{-1}(\mathbf{H}\mathbf{c}_y)$ , where  $\mathbf{c}_y$  is again a  $d$ -dimensional vector. Note that  $\mathbf{V}\mathbf{H}^{-1}$  is constant in the network and change in  $\mathbf{W}$  only affects  $\mathbf{H}\mathbf{c}_y$ . Since  $\nabla_{\mathbf{W}} \mathcal{L}_{\mathcal{T}} = (\nabla_{\mathbf{W}\mathbf{x}} \mathcal{L}_{\mathcal{T}}) \mathbf{x}^\top$ , the task-specific update is in the direction of steepest descent of  $\mathcal{L}_{\mathcal{T}}$  in the space of  $\mathbf{H}\mathbf{c}_y$  (with the Euclidean metric). This is exactly the direction of steepest descent of  $\mathcal{L}_{\mathcal{T}}$  in  $\mathbf{U}$  with respect to the metric  $g(\cdot, \cdot)$ .  $\square$

# C Additional Experiments

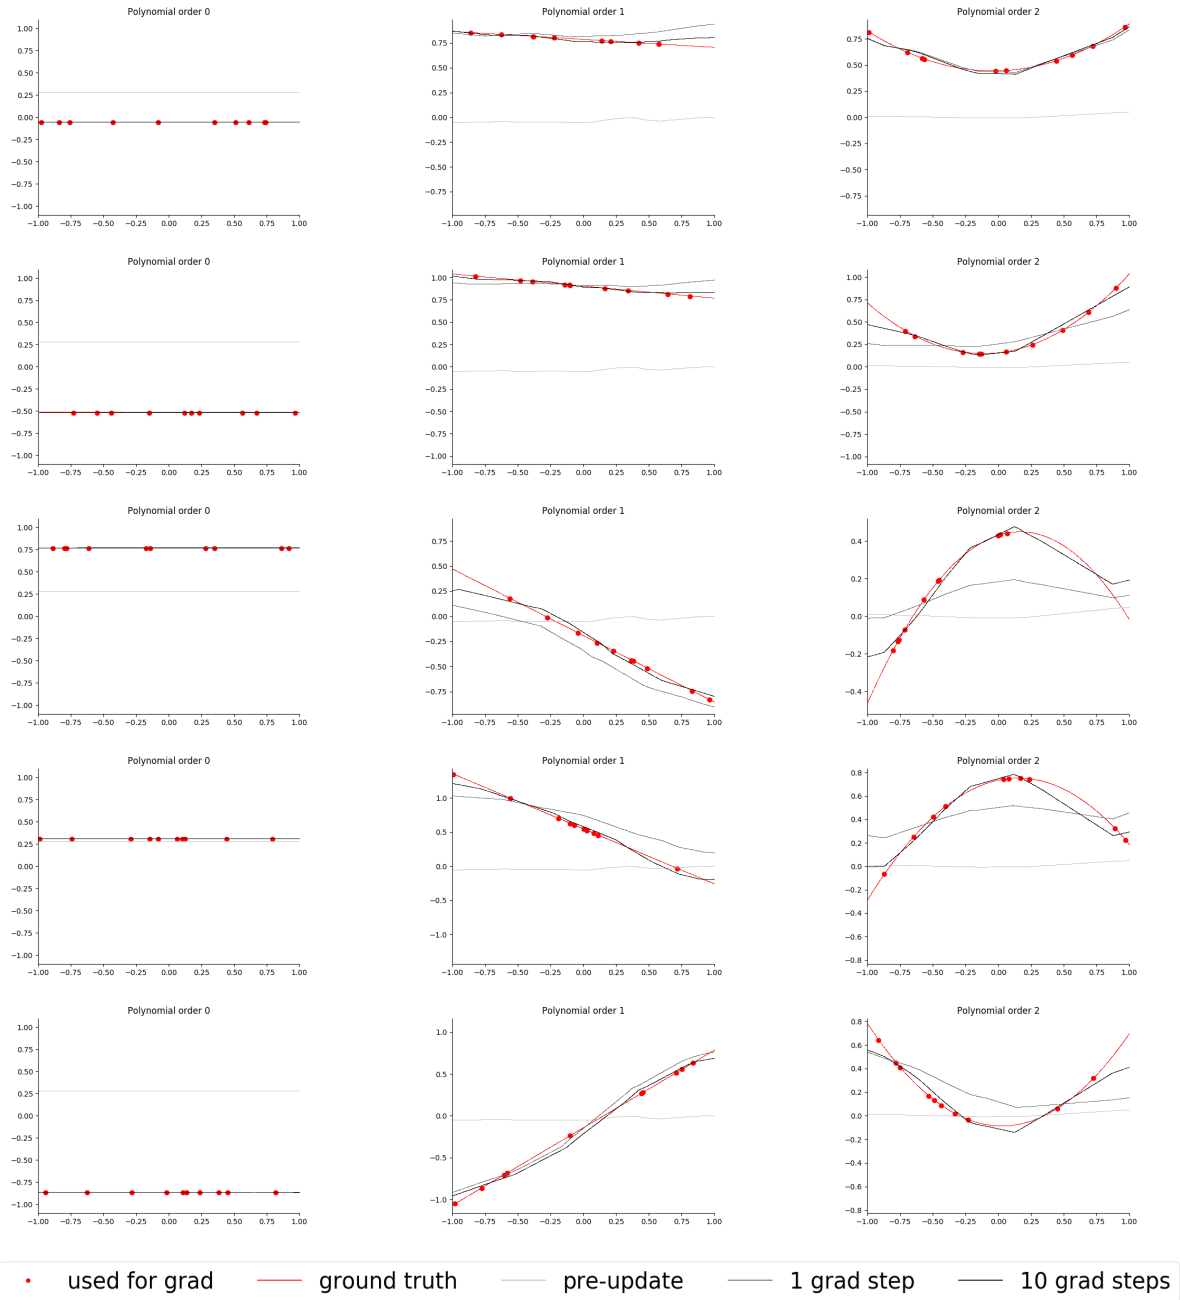

Figure 1: Additional qualitative results from the polynomial regression task
